# Supplementary material
Source: PubMed Central journal article supplement (PMC2712046)
Supplement: mmc1.pdf [file mmc1.pdf]

Biophysical Journal, Volume 96

**Supporting Material**

**Binding Thermodynamics of Ferredoxin:NADP<sup>+</sup> Reductase: Two Different Protein Substrates and One Energetics**

Marta Martínez-Júlvez, Milagros Medina, and Adrián Velázquez-Campoy

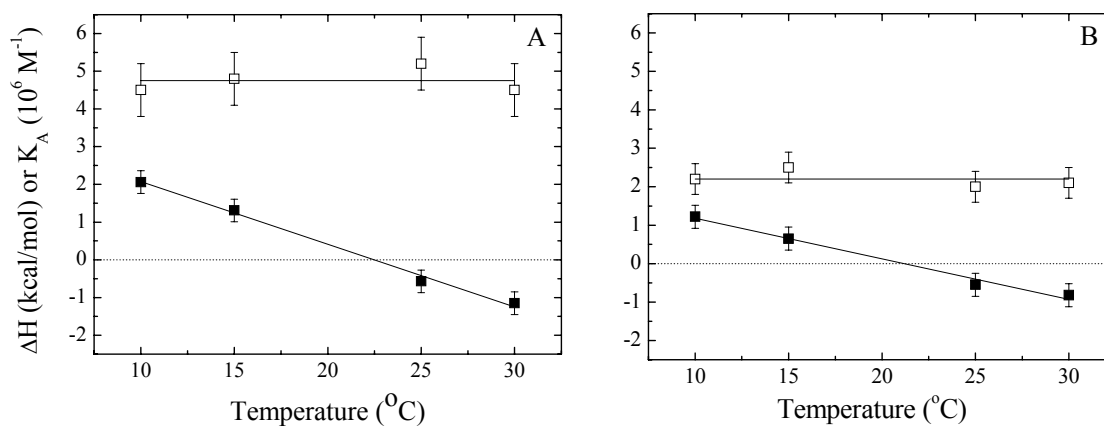

**Supporting Material.**  $\Delta H$  (■) and  $K_A$  (□) dependence with the temperature, in Glycine 50 mM, pH 10 for (A) Fd binding to FNR, and (B) Fld binding to FNR. Determination of  $\Delta H$  and  $K_A$  values were performed by applying a global analysis of the temperature dependence of the experimental data (Eq. 6).
